# Supplementary material for: Production of Corn Protein Hydrolysate with Glutamine-Rich Peptides and Its Antagonistic Function in Ulcerative Colitis In Vivo
Source: MDPI journal article supplement (doi:10.3390/foods11213359), 2022-10-25
Supplement: s1 [file s1]

## Supplementary Material

### Supplementary Material 1:

**Table S1.** Amino acid composition of CGM and APH

| Amino Acid # | CGM (g 100 g <sup>-1</sup> ) | APH (g 100 g <sup>-1</sup> ) |
|--------------|------------------------------|------------------------------|
| Asx          | 3.35                         | 4.80                         |
| Thr          | 1.97                         | 2.92                         |
| Ser          | 3.08                         | 4.38                         |
| Glx          | 12.55                        | 16.81                        |
| Gly          | 1.53                         | 2.07                         |
| Ala          | 4.91                         | 6.65                         |
| Cys          | 0.31                         | 0.00                         |
| Val          | 2.36                         | 2.66                         |
| Met          | 1.18                         | 0.84                         |
| Ile          | 2.08                         | 2.25                         |
| Leu          | 9.88                         | 12.15                        |
| Tyr          | 2.99                         | 4.15                         |
| Phe          | 3.52                         | 4.43                         |
| Lys          | 0.92                         | 1.11                         |
| His          | 1.18                         | 1.48                         |
| Arg          | 1.80                         | 2.09                         |
| Pro          | 8.03                         | 10.31                        |
| THA*         | 31.24                        | 39.29                        |
| TAA*         | 61.63                        | 79.10                        |

#Asx represents Asn and Asp; Glx represents Gln and Glu.

\*THA represents Total hydrophobic amino acid; TAA represents Total amino acid.
